# Supplementary material for: Maternal low-protein diet reduces skeletal muscle protein synthesis and mass via Akt-mTOR pathway in adult rats
Source: Frontiers journal article supplement (doi:10.3389/fnut.2022.947458), 2022-08-30
Supplement: Presentation_1.pdf [file Presentation_1.pdf]

## **Supplemental information**

# **Maternal low-protein diet reduces skeletal muscle protein synthesis and mass via akt-mTOR pathway of adult rats**

Diogo Antonio Alves de Vasconcelos<sup>1,2,4\*</sup>, Renato Tadeu Nachbar<sup>7</sup>, Carlos Hermano Justa Pinheiro<sup>4</sup>, Cátia Lira do Amaral<sup>4</sup>, Amanda Rabello Crisma<sup>4</sup>, Kaio Fernando Vitzel<sup>4,5</sup>, Phablo Abreu<sup>4</sup>, Maria Isabel Alonso Vale<sup>4</sup>, Andressa Bolsoni Lopes<sup>4</sup>, Adriano Bento-Santos<sup>2</sup>, Filippe Falcão-Tebas<sup>6</sup>, David Filipe de Santana<sup>2</sup>, Elizabeth do Nascimento<sup>1</sup>, Rui Curi<sup>3,4</sup>, Tania Cristina Pithon-Curi<sup>3</sup>, Sandro Massao Hirabara<sup>3</sup>, Carol Góis Leandro<sup>2</sup>

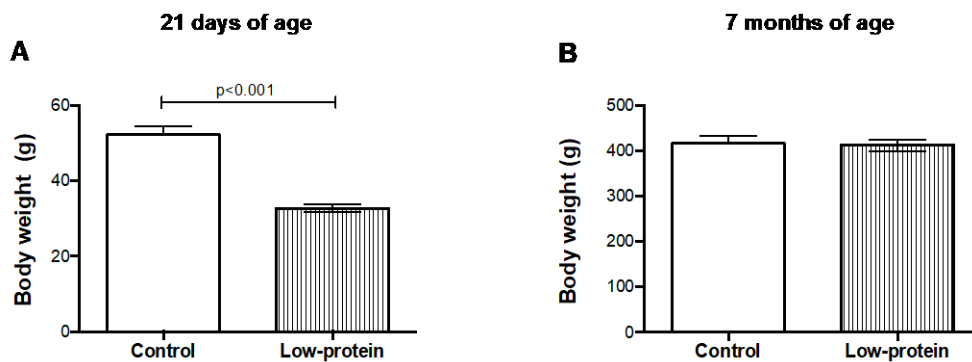

**Figure S1. Body weight at 21 days postpartum and at the age of 7 months of pups born to mothers fed a low-protein diet during pregnancy and lactation.** Body weight at 21 days (A) and at 7 months (B) of pups born to mothers fed a normoproteic (control, n=9-15) or low-protein (LP, n=9-15) diet during pregnancy and lactation. Results analyzed using an unpaired t test. Values expressed as mean± SEM.

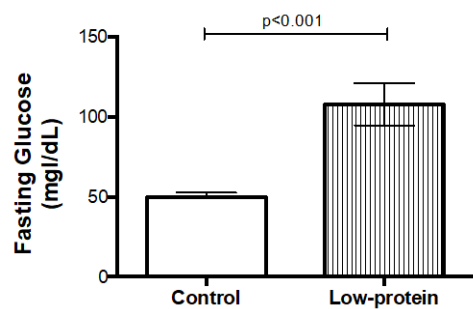

**Figure S2. Long-term effects induced by low-protein during early life on glycemia from adults rats.** The serum glucose concentration was determined using a commercial kit (glycemia - Laborclin, Pinhais, PR, Brazil) after 12 hours of fasting from rats at 7 months of age. p<0.001 for comparison between low-protein and control (unpaired t test). Values are expressed as mean ± SEM of 10-14 rats.

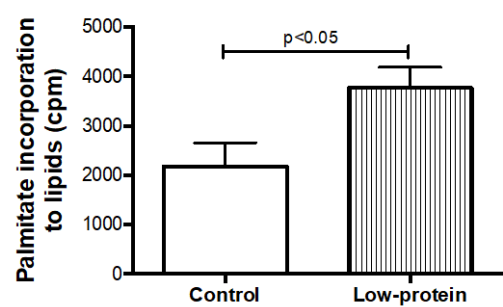

**Figure S3. Long-term effects induced by low-protein during early life on lipogenesis of white adipose tissue from adults rats.** The lipogenesis was determinate by [1-<sup>14</sup>C]-palmitate incorporation into TAG, in isolated adipocytes extracted from epididymal adipose tissue of rats at 7 months of age. p<0.05 for comparison between low-protein and control (unpaired t test). Values are expressed as mean ± SEM of 4 rats.

A

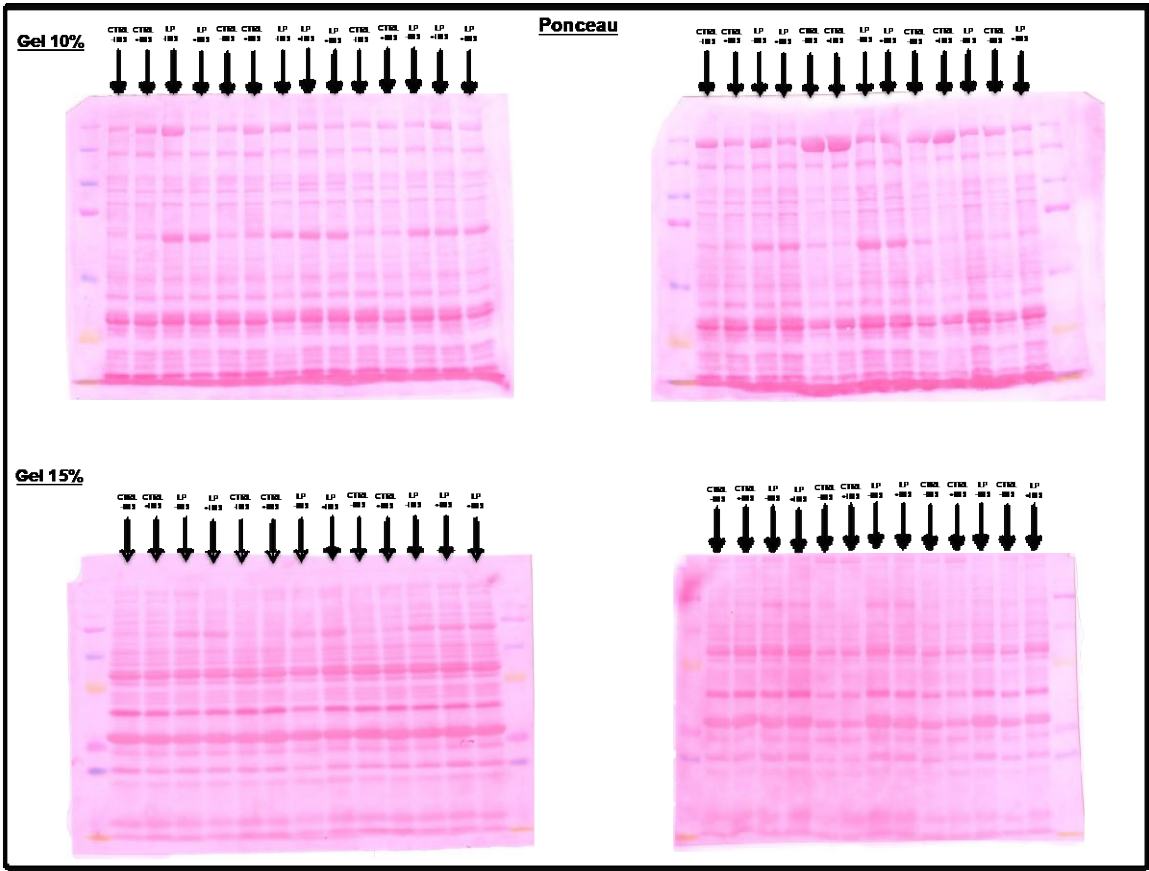

B

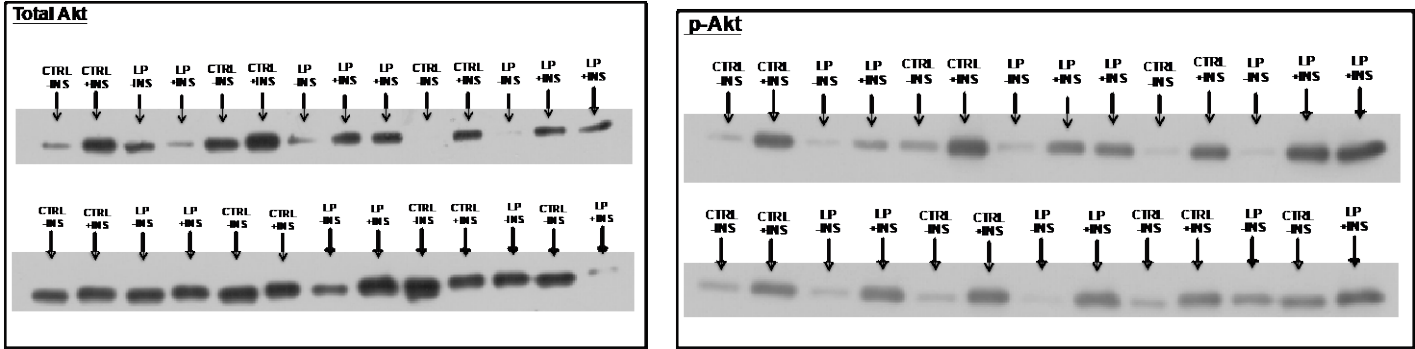

C

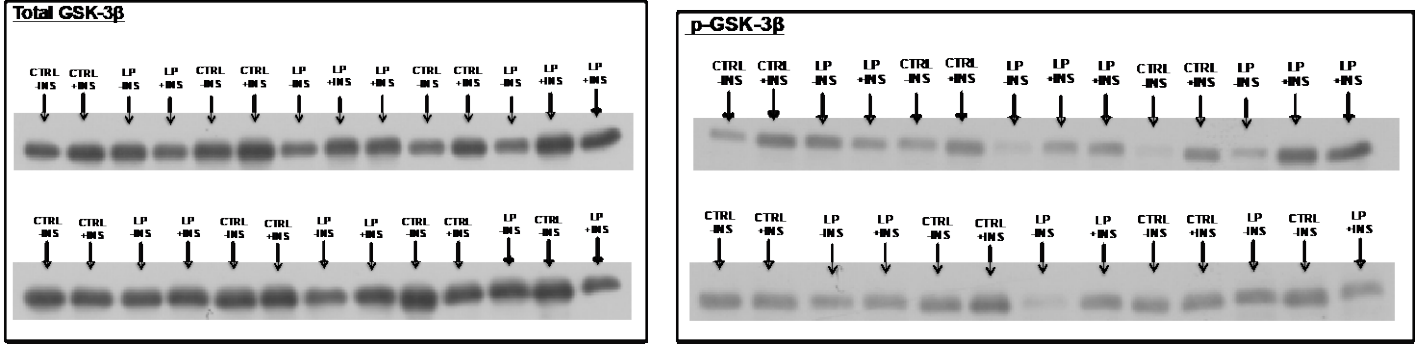

D

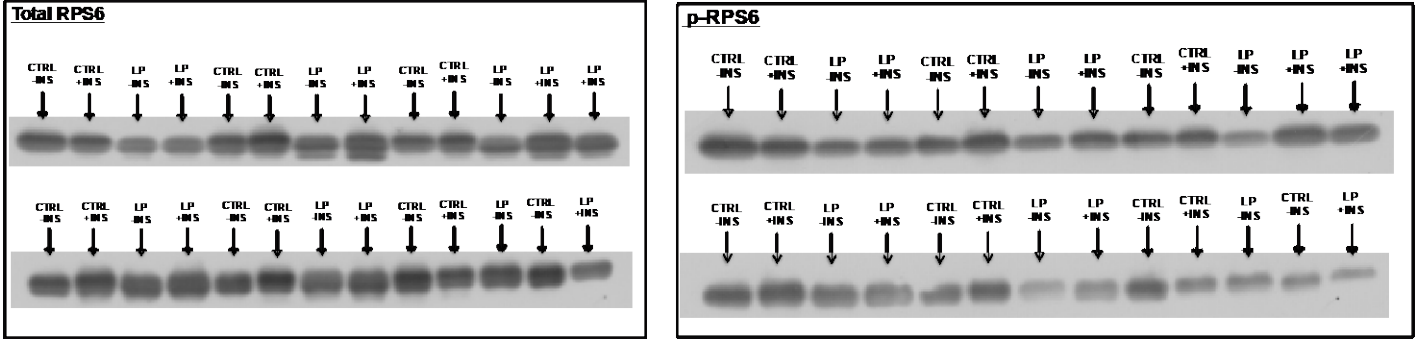

E

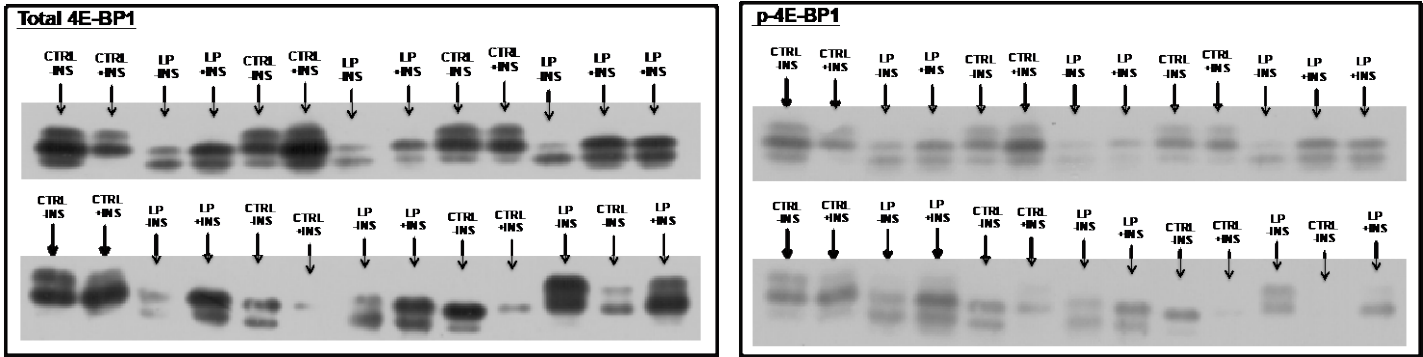

**Figure S4. Membranes and blots of western blotting assays of insulin signaling proteins in the incubated soleus muscle from adult rats submitted to the early low-protein diet.** Ponceau S staining of nitrocellulose membranes after protein transfer from 10% and 15% polyacrylamide gels (A); blots of total and phosphorylated Akt (B), GSK-3 $\beta$  (C), RPS6 (D) and 4E-BP1 (E).
